# Supplementary material
Source: publisher site journal article supplement (https://www.dovepress.com/get_supplementary_file.php?f=323472.docx)

Table S1 Survey questionnaire items

|  | Constructa | Textb |
| --- | --- | --- |
| **Q1** | General risk loving, weather | Suppose it is not raining when you go out. At what chance of rain would you take your umbrella or some other measure for rain? Please circle the number closest to your answer from the following choices.  0%, 10%, 20%, 30%, 40%, 50%, 60%, 70%, 80%, 90%, 100% |
| **Q2** | General risk averse, travel | When you have a seat reservation for a train, how early (in minutes) do you usually arrive at the station? Please circle the number closest to your answer from the following choices.  3 min, 5 min, 7 min, 10 min, 15 min, 20 min, 25 min, 30 min, 35 min, 40 min,  45 min, 50 min, 60 min, or more |
| **Q3** | Feeling rushed | Are you so busy that you feel rushed? Please circle the response that most closely matches your answer from the following choices.  1. I feel very rushed 2. I feel somewhat rushed 3. I cannot say either way  4. I have some time to spare 5. I have plenty of time to spare |
| **Q4** | Sleeping hours | How many hours do you sleep per night on average?  About_______ hours |
| **Q5** | Sleep deprivation | Do you get enough sleep? Please circle the response that most closely matches your answer from the following choices.  1. Never enough 2. Not quite enough 3. Cannot say either way 4. Nearly enough 5. More than enough |
| **Q6** | Procrastination, childhood | Thinking back to when you were a child and you were given an assignment during school vacation, how early did you usually finish up the assignment?  1. I tended to get it done early, before the due date. (Early)  2. I worked on it daily, up until the due date. (Daily)  3. I tended to get it done toward the end. (End) |
| **Q7** | Procrastination,  now | Thinking about yourself now, if you were given an assignment during school vacation, how early would you finish up the assignment?  1. I would get it done rather early, before the due date. (Early)  2. I would work on it daily, up until the due date. (Daily)  3. I would get it done rather toward the end. (End) |
| **Q8** | Acceptance of medical uncertainty | A doctor tells you that the effectiveness of the medicine they are prescribing can vary among individuals and that it might not work for your ailment. Would this explanation be sufficient for you?  1. Yes 2. Probably 3. Not sure 4. Probably not 5. No |
| **Q9** | OOPmed | On average, how much money do you spend on medical treatments every month?  Monthly average: ¥ |
| **Q10** | Subjective risk estimation for CVD | Out of 100 people including yourself, how many of them would have to have a heart attack or stroke within 10 years to make you believe that you will also have a heart attack or stroke  people out of 100 |
| **Q11** | WTPcvr | Imagine that half (50) of the 100 people including yourself have a heart attack or stroke within 10 years. A certain type of medicine can reduce that number to 25. How much would you pay every month to continue taking that medicine?  I would pay up to ¥ every month just for that medicine |
| **Q12** | Lottery,  risk taker | Suppose that there is a speed lottery with a 1% chance of winning JPY 100,000. If you win, you get the prize right away. If you lose you get nothing. How much would you spend to buy a ticket for this lottery? Choose “Buy” or “Do not buy” for each price of the ticket.  Lottery price  ¥10 1. Buy 2. Do not buy  ¥100 1. Buy 2. Do not buy  ¥300 1. Buy 2. Do not buy  ¥500 1. Buy 2. Do not buy  ¥1,000 1. Buy 2. Do not buy  ¥2,000 1. Buy 2. Do not buy  ¥3,000 1. Buy 2. Do not buy  ¥5,000 1. Buy 2. Do not buy  ¥10,000 1. Buy 2. Do not buy  ¥50,000 1. Buy 2. Do not buy |
| **Q13** | Insurance,  risk averse | Assume that you know there is a 1% chance of losing JPY 100,000 on a given day. You can take out insurance to cover this amount in case of loss. If an insurance policy is sold as listed below, would you purchase it? Choose “purchase” or “do not purchase” for each insurance price.  ¥10 1. Purchase 2. Do not purchase  ¥100 1. Purchase 2. Do not purchase  ¥300 1. Purchase 2. Do not purchase  ¥500 1. Purchase 2. Do not purchase  ¥1,000 1. Purchase 2. Do not purchase  ¥2,000 1. Purchase 2. Do not purchase  ¥3,000 1. Purchase 2. Do not purchase  ¥5,000 1. Purchase 2. Do not purchase  ¥10,000 1. Purchase 2. Do not purchase  ¥50,000 1. Purchase 2. Do not purchase |
| **Q14** | Educational level  (total number of years in education) | Please circle your highest academic qualification from the following choices.   1. Junior high school (9 years) 2. High school (12 years) 3. Vocational college (13–15 years) 4. Junior college/technical college (14–15 years) 5. University (16 years) 6. Graduate school (18 years or more) |
| **Q15** | Job status | Please tell us about your work.  Circle 1 if you have worked to earn an income during the past month or circle 2 if you did not work at all.  1. Worked 2. Did not work |
| **Q16** | Savings | Do you currently have any savings? Please circle the option that most closely matches your situation from the following choices.  1. I do not have any savings. 2. My savings have increased.  3. My savings have not changed. 4. My savings have decreased. |
| **Q17** | Economic status | How would you classify your current financial situation as a whole? Please circle the answer that most closely matches your situation from the following choices.  1. Very difficult 2. Somewhat difficult 3. Normal  4. Somewhat affluent 5. Very affluent |

**Notes:** aConstructs were not shown to participants. bThe Japanese version is shown in Figure S2. OOPmed, out-of-pocket average monthly expenditure on medical care. CVD, cardiovascular disease. WTPcvr, willingness-to-pay for a medicine that could reduce CVD risk.

Table S2 Multiple regression analysis of factors associated with prices willing to pay for a medicine reducing CVD risk

|  | Estimate | standard error | t Ratio | p value | VIF |
| --- | --- | --- | --- | --- | --- |
| Age | –50.4 | 41.8 | –1.20 | 0.229 | 1.02 |
| Q9 OOPmed | 0.106 | 0.064 | 1.66 | 0.097 | 1.01 |
| Q10 Subjective risk estimation for CVD | –46.4 | 26.0 | –1.79 | 0.075 | 1.00 |
| Q17 Economic statusa | 3655 | 609 | 6.00 | < 0.001 | 1.01 |

**Notes:** aOrdinal scale was treated as a continuous variable. OOPmed, out-of-pocket (OOP) average monthly expenditure on medical care. Data of 671 patients with diabetes or stable endocrine from Emoto N, Soga A, Fukuda I, et al. Irrational responses to risk preference questionnaires by patients with diabetes with or without retinopathy and comparison with those without diabetes. *Diabetes Metab Syndr Obes*. 2020;13:4961–4971.16

**Abbreviations:** CVD, cardiovascular disease. VIF, variance inflation factor.

**Supplemental Figure Legends**

Figure S1. Flow chart of the study design.

Figure S2. Japanese version of the survey questionnaire texts shown in Table S1.

Figure S3. Linear fit of price willing to pay to reduce CVD risk (Q11) according to serum level of FT4.

Of the 140 returned survey forms from a cumulative total of 184 surveys given to 119 patients, 7 surveys in 6 patients did not have answers for Q11. A total of 133 answers in 113 patients were analyzed. Price willing to pay (¥/month) = 2992 + 3115 × FT4 (ng/dL), R2 = 0.0419. Analysis of variance; degrees of freedom = 1, sum of squares = 723677711, F Ratio = 5.73, p = 0.018.

Figure S4. Linear fit of average out-of-pocket expenditure on medical care (Q9) according to serum level of FT4.

Of the 140 returned survey forms from a cumulative total 184 surveys given to 119 patients, Q9 was not answered in two surveys. A total of 138 answers in 117 patients were analyzed. Out-of-pocket expenditure (¥/month) = 3734 + 2525 × FT4 (ng/dL), R2 = 0.091. Analysis of variance; degrees of freedom = 1, sum of squares = 488146254, F Ratio = 13.5, p = 0.0003.

Figure S1


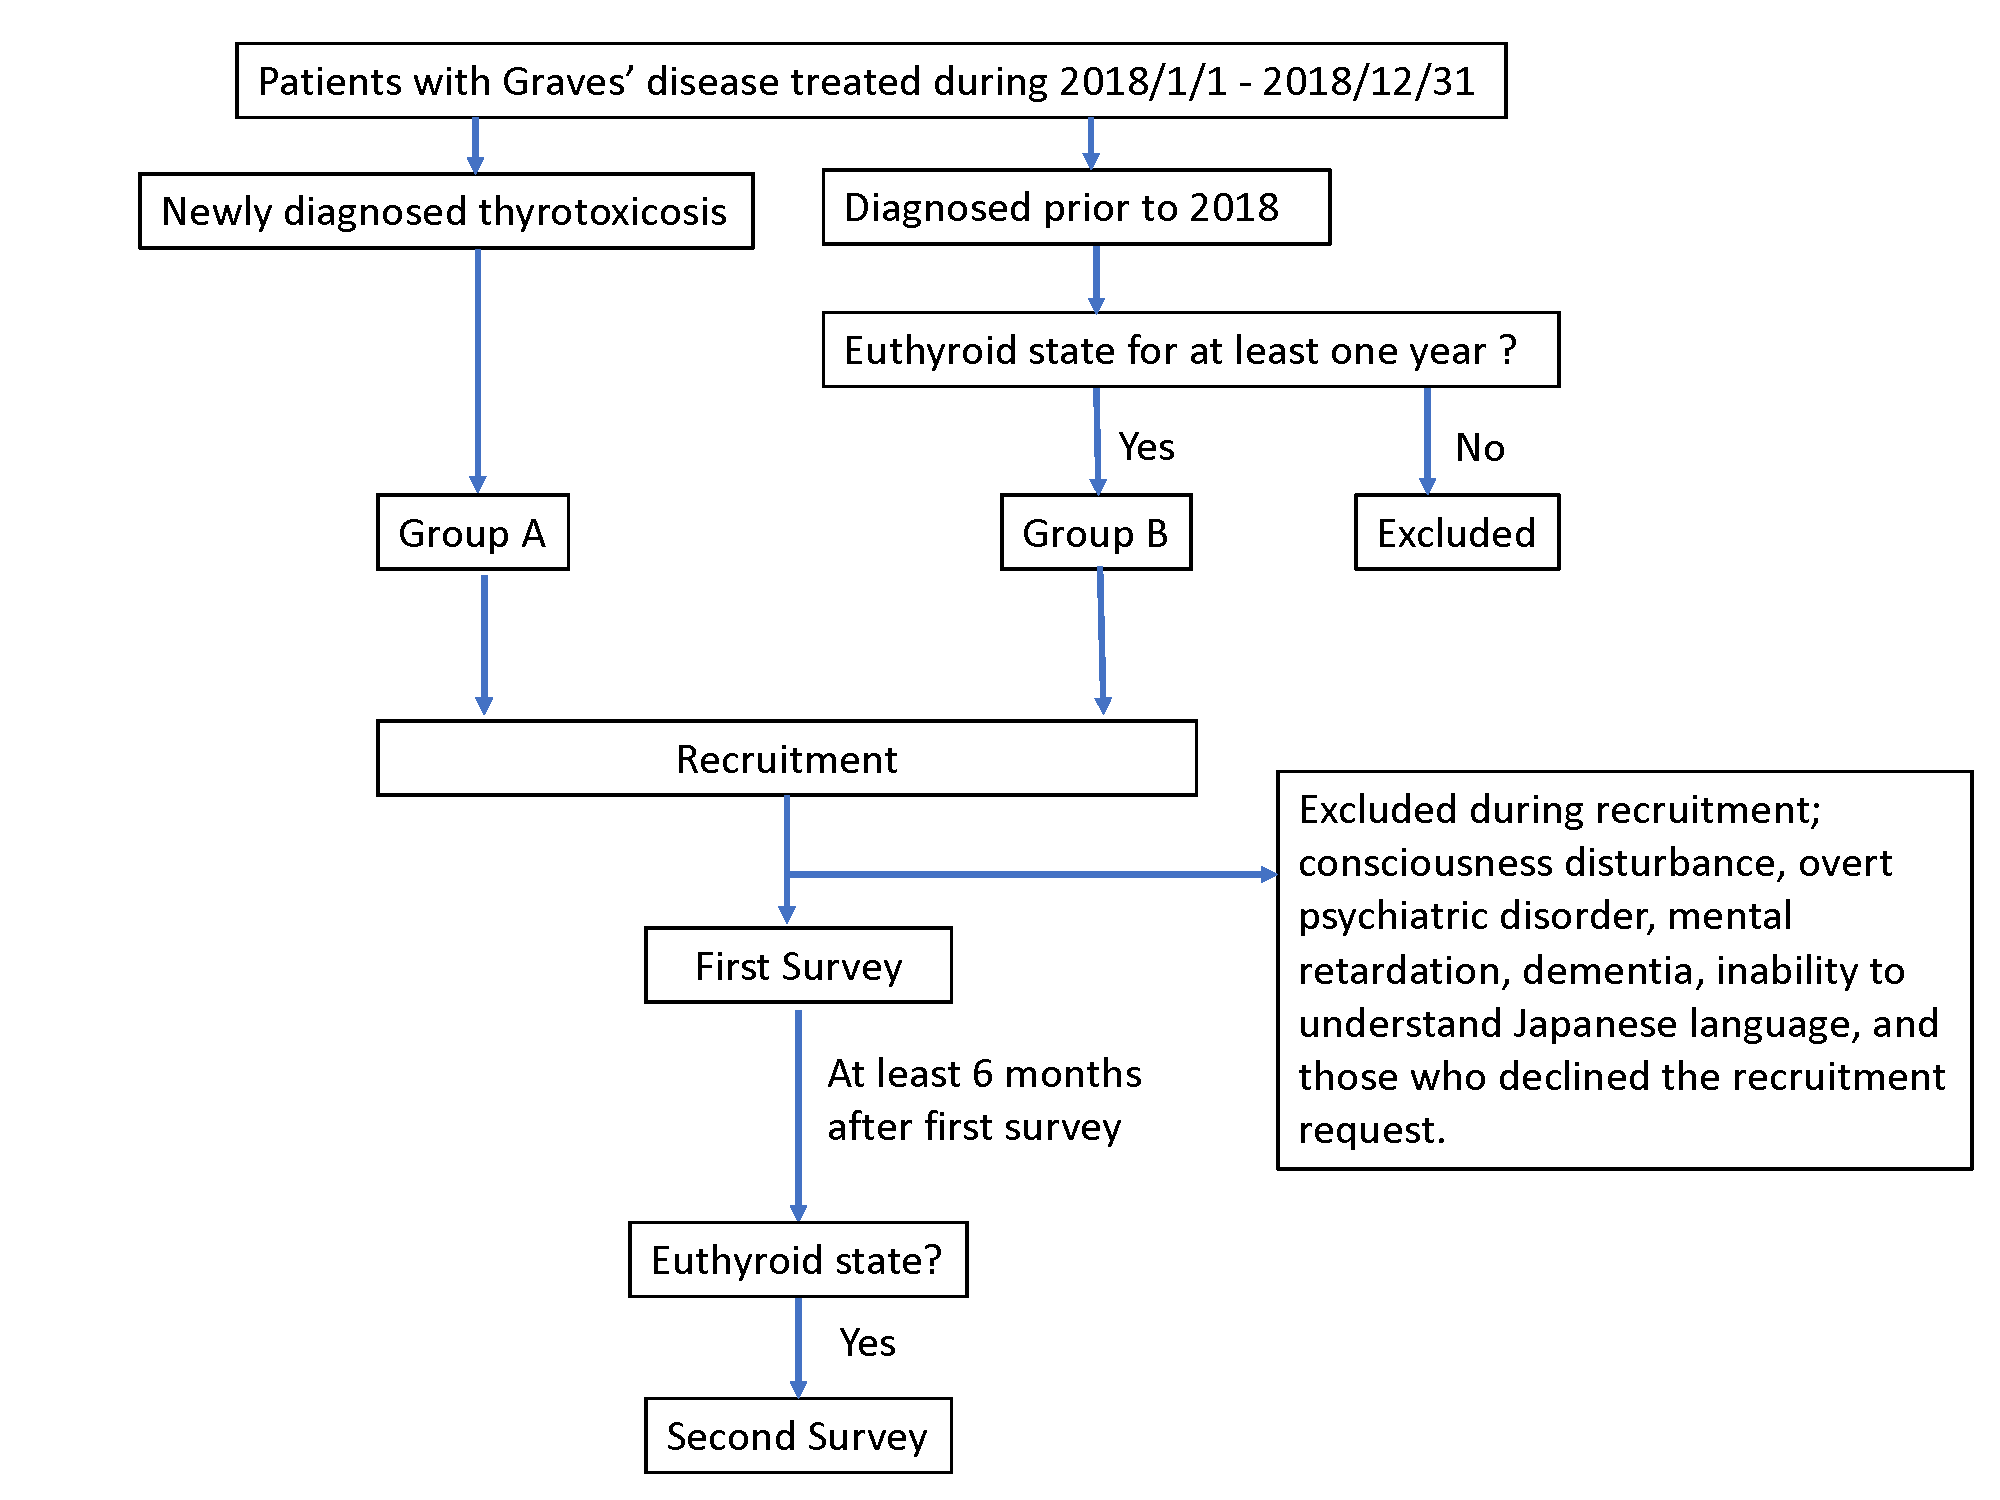


Figure S2-1





Figure S2-2





Figure S2-3





Figure S2-4





Figure S3


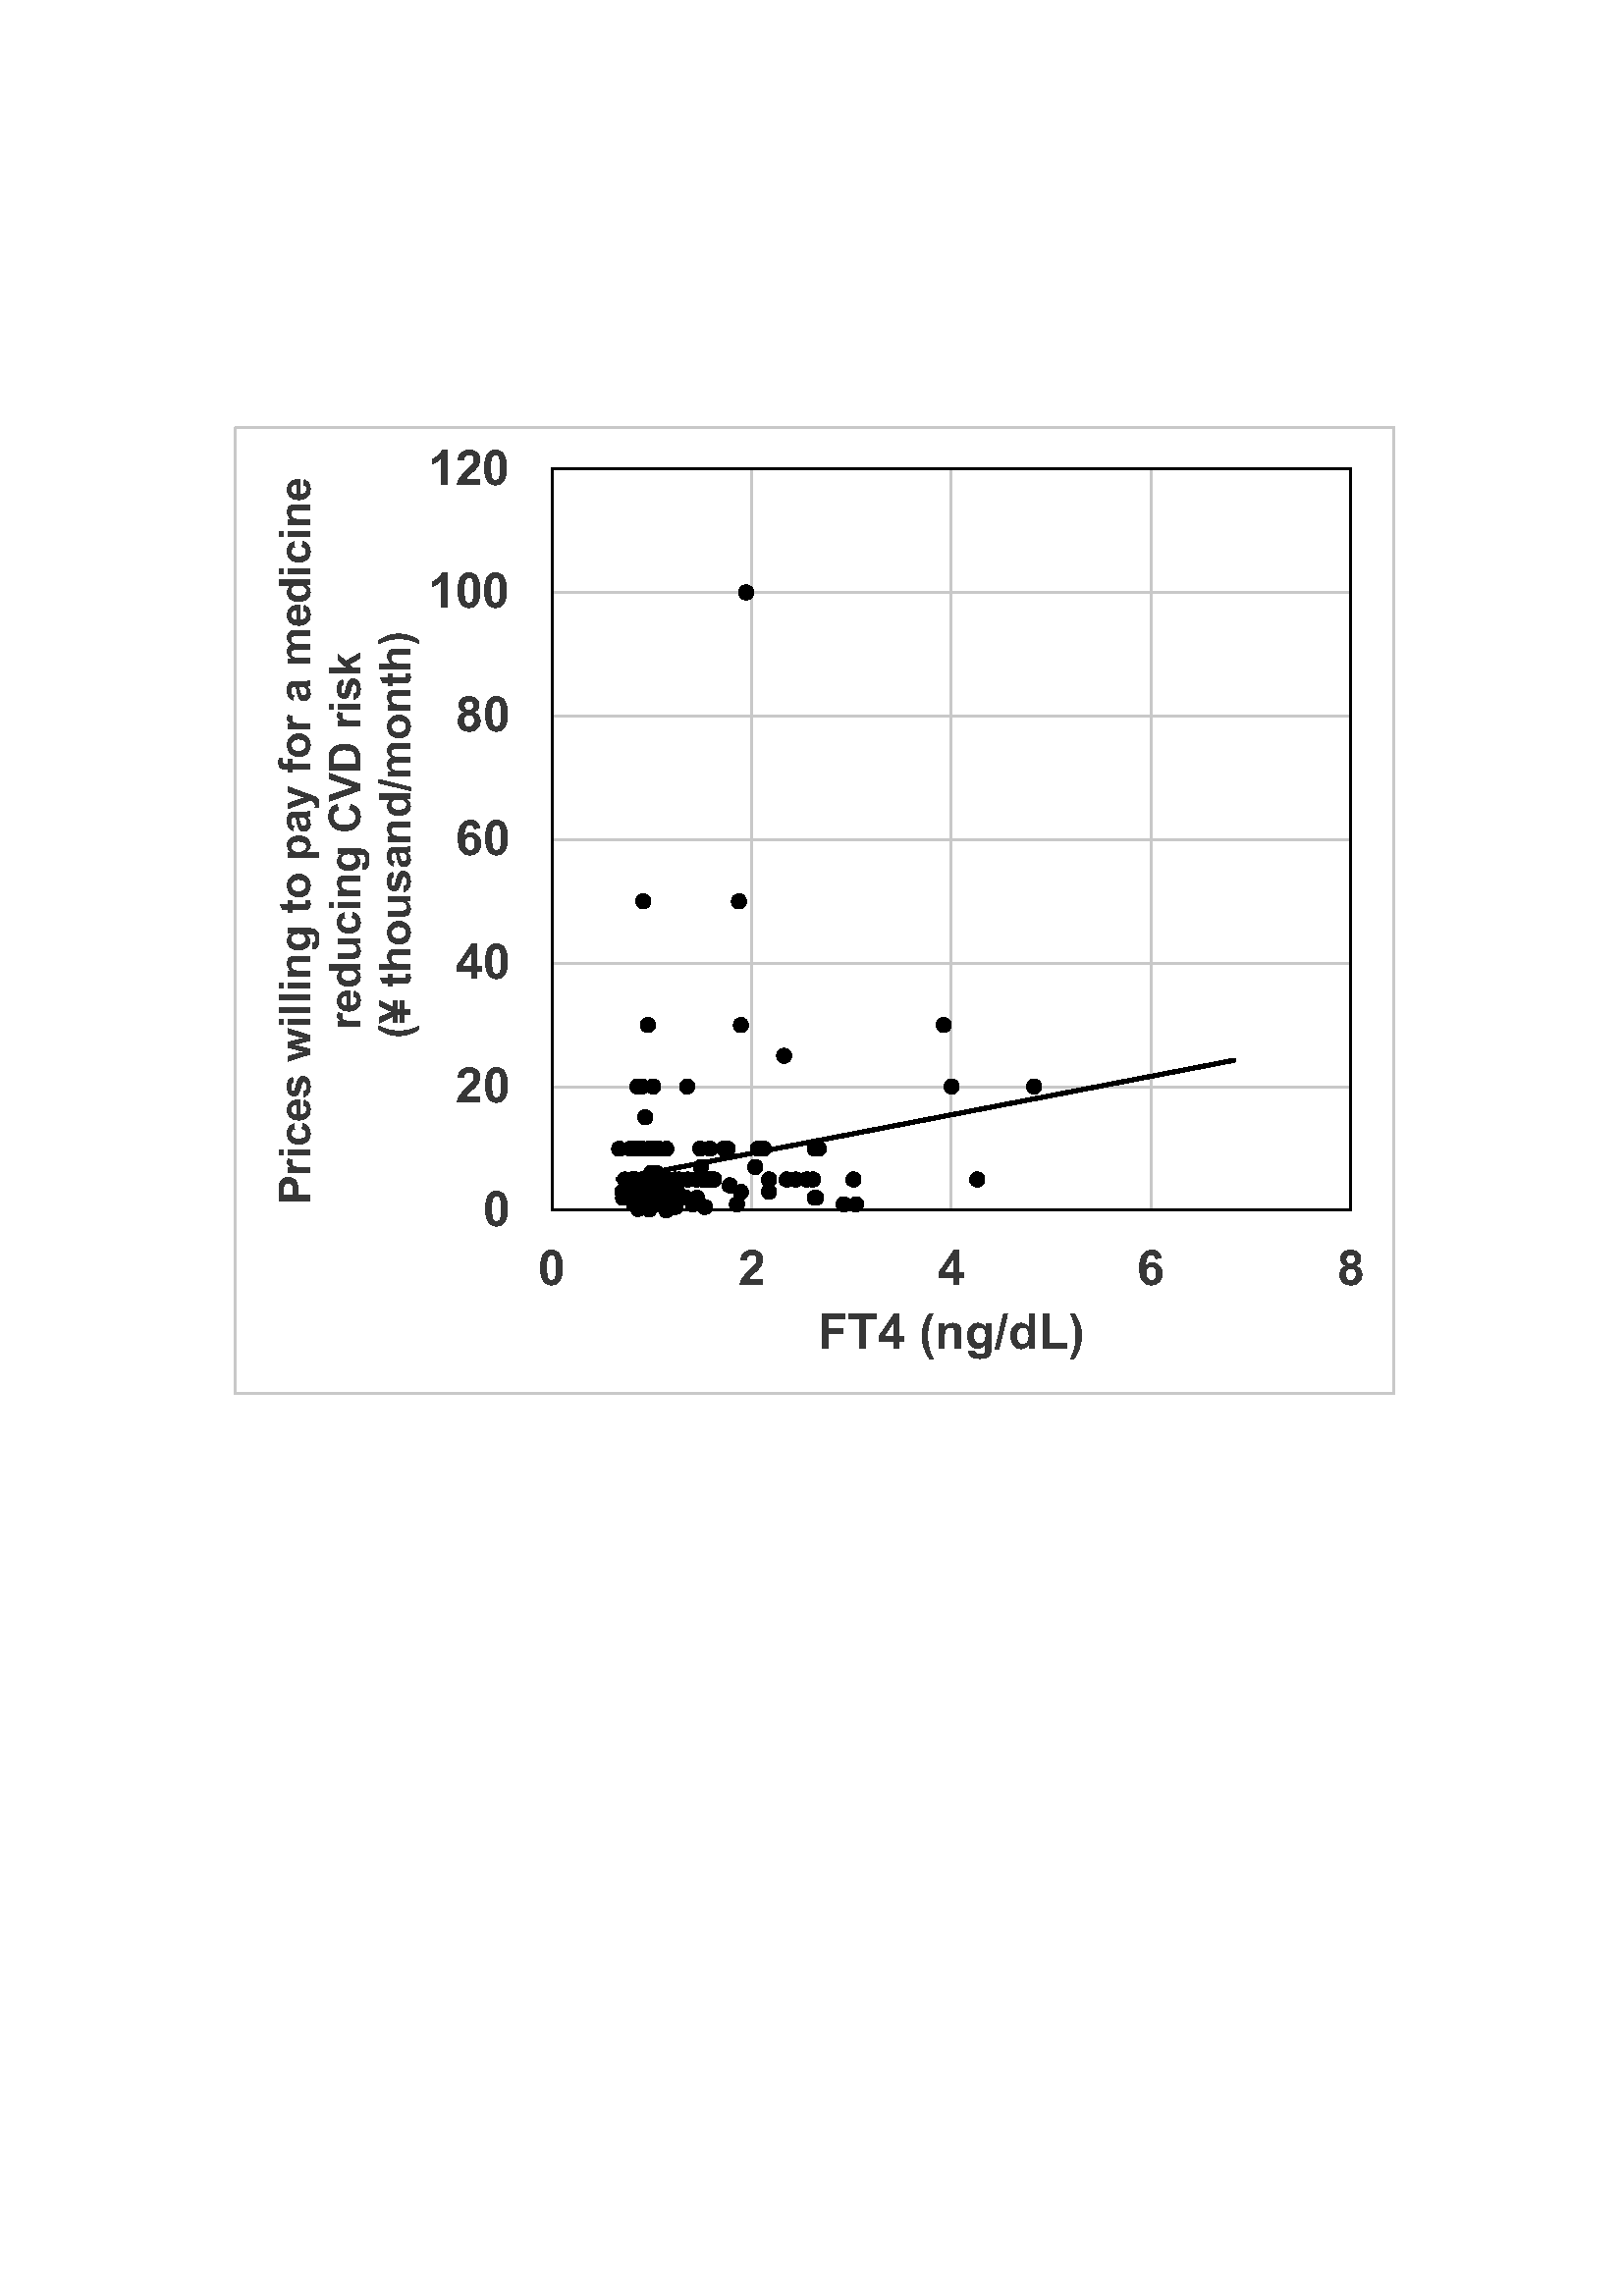


Figure S4


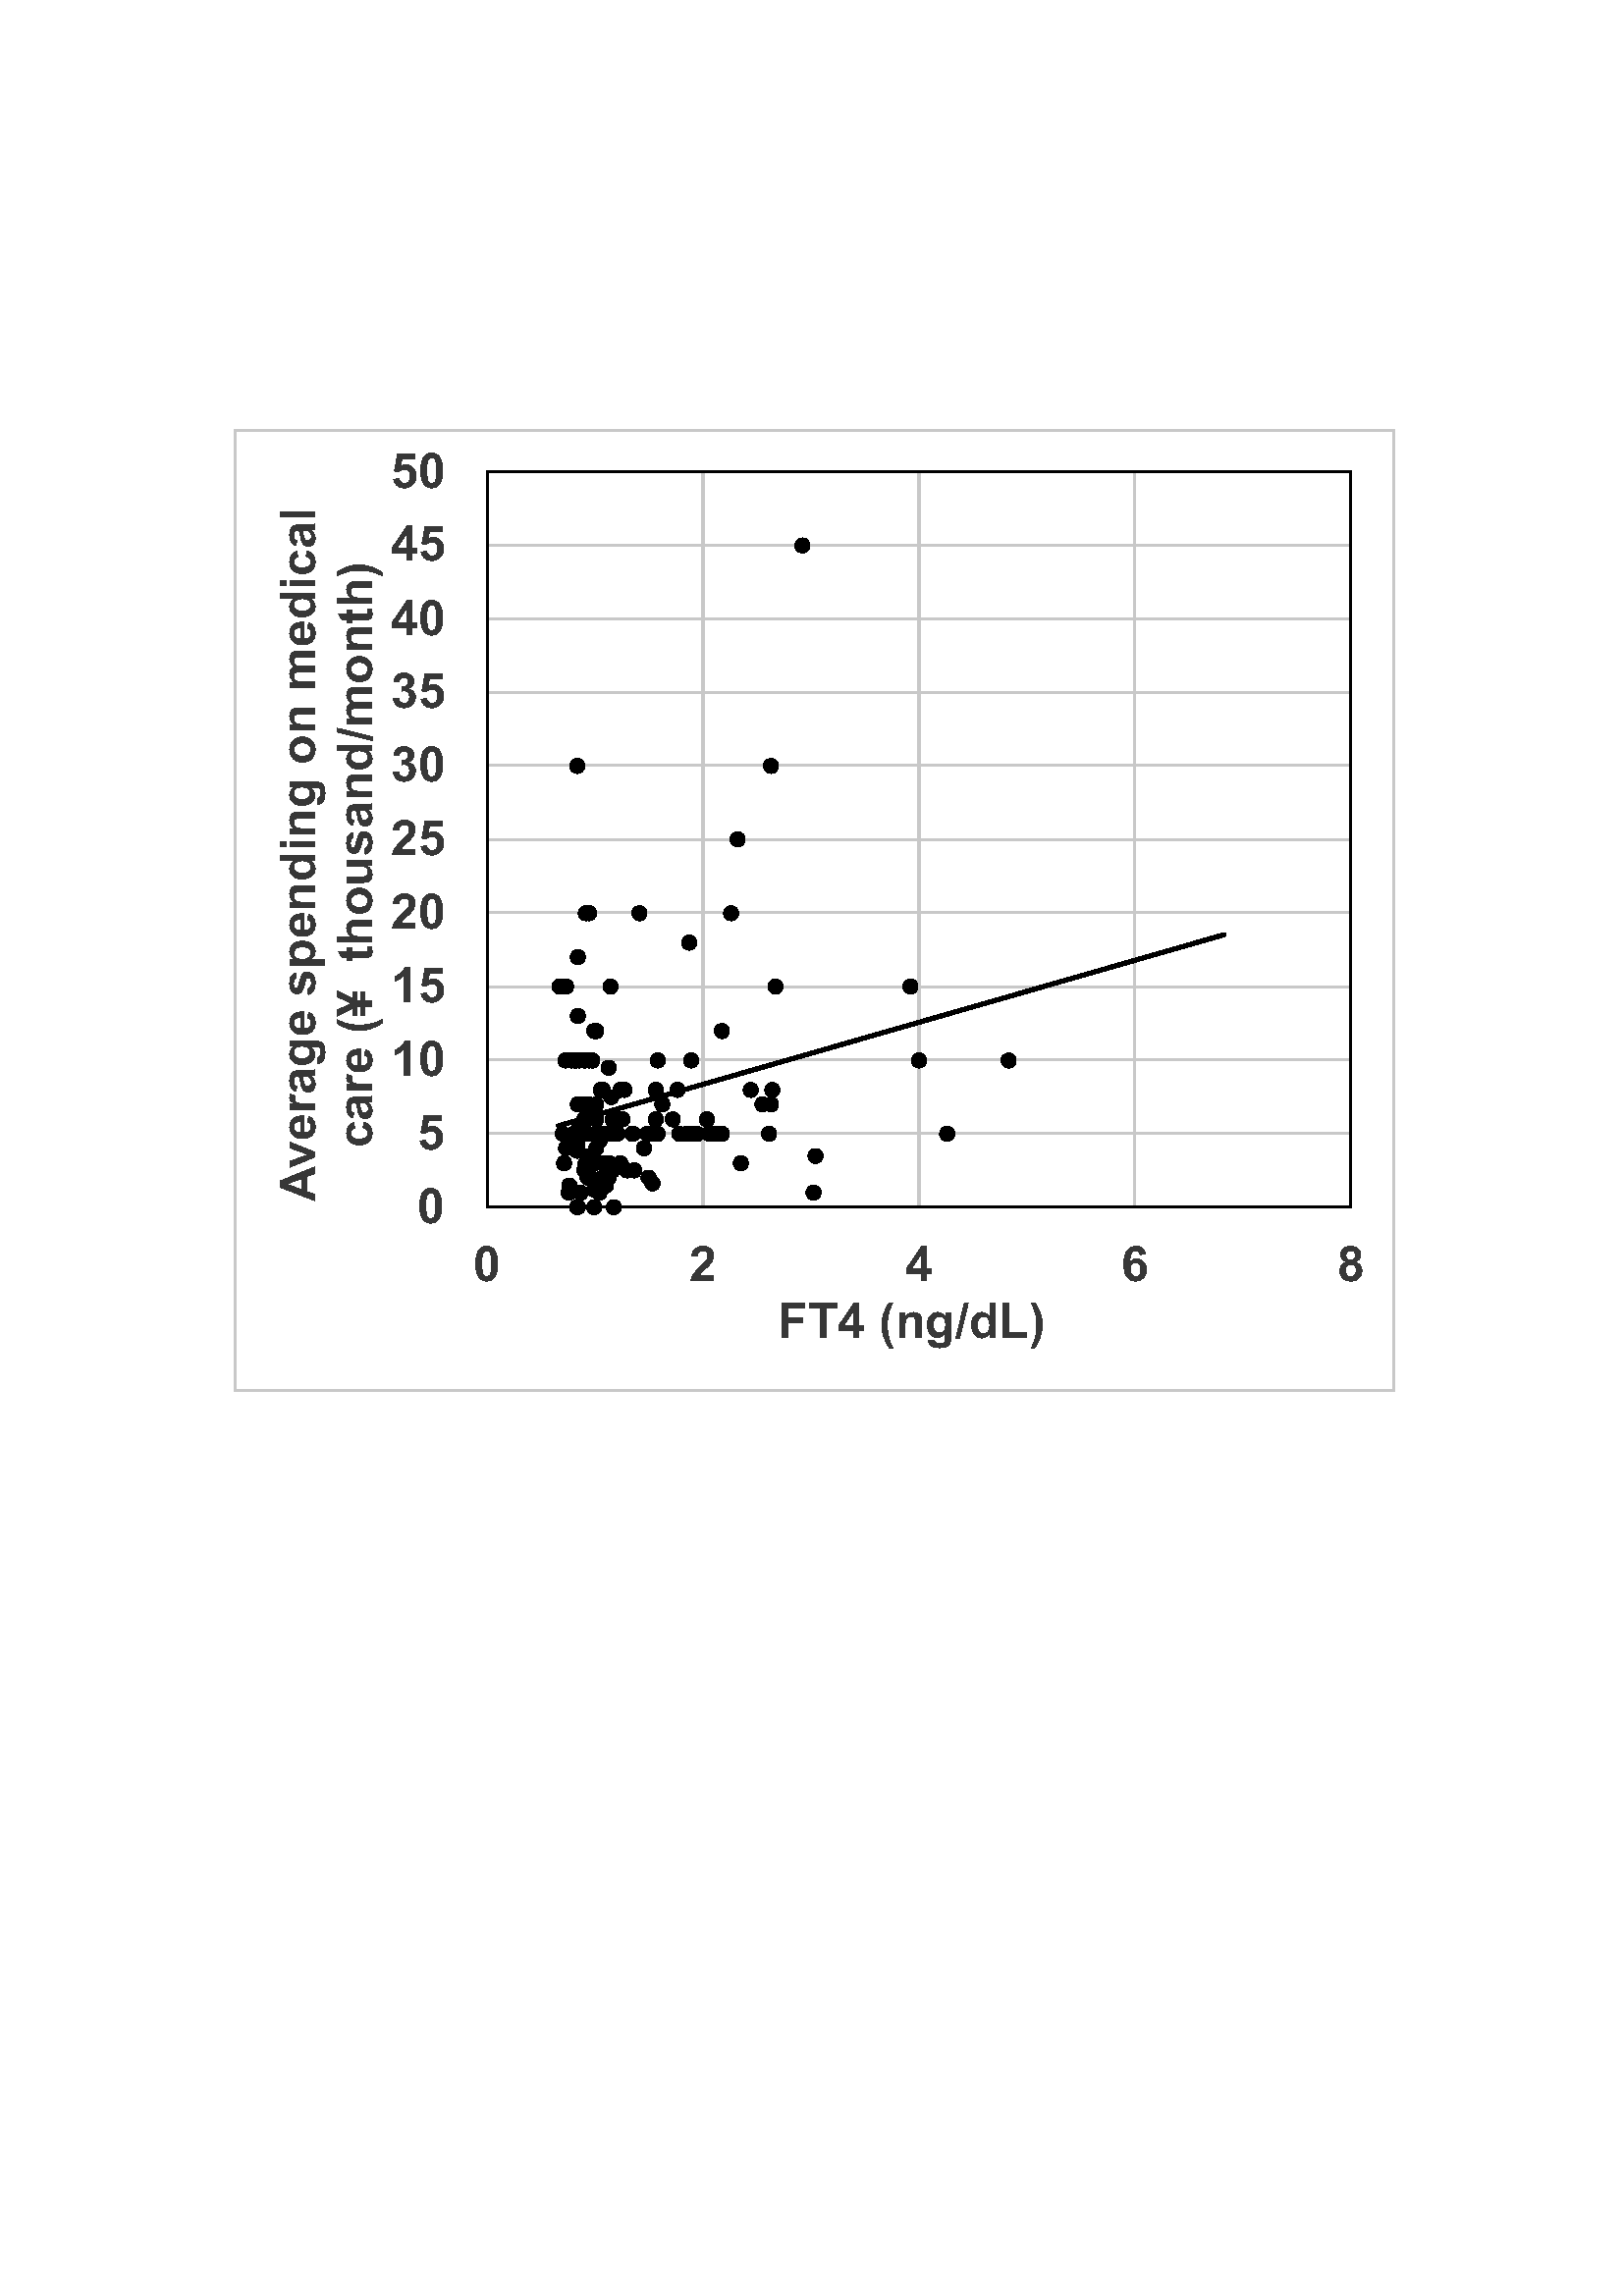

Supplement: Supplementary file 1 [file get_supplementary_file.php]
